# Supplementary material
Source: HighWire-hosted journal article supplement (http://ep.bmj.com/highwire/filestream/138262/field_highwire_adjunct_files/0/edpract-2013-305271supp.docx)
Supplement: edpract-2013-305271supp.docx [file edpract-2013-305271supp.docx]

# Appendix 1 Search Strategy

| No. | Search | No of citations |
| --- | --- | --- |
| 1 | “neonatal”AND”conjunctivitis”AND”investigation” | 22 |
| 2 | “opthalmia” AND “neonatorum” | 741 |
| 3 | “investigation” AND “conjunctivitis” | 349 |
| 4 | “guidelines” AND “conjunctivitis” | 208 |
|  |  |  |

Database used: Pubmed

Date search performed: 1/7/13
